# Supplementary material for: Two Dimensional Yau-Hausdorff Distance with Applications on Comparison of DNA and Protein Sequences
Source: PLoS One. 2015 Sep 18;10(9):e0136577. doi: 10.1371/journal.pone.0136577 (PMC4575136; doi:10.1371/journal.pone.0136577)
Supplement: S1 File — (PDF) [file pone.0136577.s001.pdf]

# 1 Proof that Yau-Hausdorff distance is a metric

## 1.1 Lemma 1:

Let  $A$  and  $B$  be two sets of finite points in  $\mathbb{R}^d$ ,  $d(a, b) = |a - b|$  is the Euclidean distance. For  $a \in A$ , we define  $d(a, B) = \min_{b \in B} d(a, b)$ . Similarly, we define  $d(b, A) = \min_{a \in A} d(b, a)$ . Then define  $d(A, B) = \max_{a \in A} d(a, B)$ ,  $d(B, A) = \max_{b \in B} d(b, A)$  and  $h(A, B) = \max\{d(A, B), d(B, A)\}$ . Then  $h$  is a metric.

Proof:

1. Obviously  $h \geq 0$ .

If  $h(A, B) = 0$ , then  $d(A, B) = d(B, A) = 0$ .  $\max_{a \in A} d(a, B) = 0$ , implies for each  $a \in A$   $d(a, B) = 0$ . We have  $\min_{b \in B} d(a, b) = 0$  for any  $a \in A$ . Because  $B$  is a finite set, we can find  $b \in B$ , s.t.  $b = a$ .

This gives us  $A \subset B$ , similarly we have  $B \subset A$ . Hence  $A = B$ .

On the other hand if  $A = B$ , we have  $h(A, B) = 0$  from definition, so  $h(A, B) = 0$  if and only if  $A = B$ .

2.  $h(A, B) = \max\{d(A, B), d(B, A)\} = \max\{d(B, A), d(A, B)\} = h(B, A)$ .
3. We take three sets finite point sets  $A, B, C$  in  $\mathbb{R}^d$  and show that  $h(A, B) \leq h(A, C) + h(C, B)$ , i.e.

$$\max\{d(A, B), d(B, A)\} \leq \max\{d(A, C), d(C, A)\} + \max\{d(C, B), d(B, C)\} \quad (1)$$

First we show that

$$d(a, B) \leq d(a, C) + d(C, B) \quad (2)$$

for each  $a \in A$ .

Assume

$$d(a, C) = \min_{c \in C} d(a, c) = d(a, c_0), c_0 \in C \quad (3)$$

$$d(c_0, B) = \min_{b \in B} d(c_0, b) = d(c_0, b_0), b_0 \in B \quad (4)$$

It follows that

$$d(a, B) \leq d(a, b_0) \quad (5)$$

$$\leq d(a, c_0) + d(c_0, b_0) \quad (6)$$

$$= d(a, C) + d(c_0, B) \quad (7)$$

$$\leq d(a, C) + d(C, B) \quad (8)$$

and equation (2) holds. Hence

$$d(a, B) \leq d(a, C) + d(C, B) \quad (9)$$

$$\leq d(A, C) + d(C, B) \quad (10)$$

$$\leq \max\{d(A, C), d(C, A)\} + \max\{d(C, B), d(B, C)\} \quad (11)$$

$$= h(A, C) + h(C, B) \quad (12)$$

for each fixed  $a \in A$ .

Take the maximum of the left hand of this inequality,

$$d(A, B) = \max_{a \in A} d(a, B) \leq h(A, C) + h(C, B) \quad (13)$$

Similarly we can get

$$d(B, A) \leq h(A, C) + h(C, B) \quad (14)$$

$$h(A, B) = \max\{d(A, B), d(B, A)\} \leq h(A, C) + h(C, B) \quad (15)$$

The triangle inequality holds.

We have proven that  $h$  is a metric.

## 1.2 Lemma 2:

Let  $A$  and  $B$  be two sets of finite points in  $\mathbb{R}^d$ . For a translation vector  $t \in \mathbb{R}^d$ , we define  $A + t = \{a + t | a \in A\}$ . For a rotation  $\theta$ , we define  $A^\theta$  to be the set  $A$  rotated around the origin by  $\theta$ . Let  $H^d(A, B) = \inf_{t, \theta} h(A^\theta + t, B)$ , then  $H^d$  is a metric, and is called minimum d-dimensional Hausdorff metric.

Proof:

1.

$$H^d(A, B) = \inf_{t, \theta} h(A^\theta + t, B) \geq 0 \quad (16)$$

If  $H^d(A, B) = 0$ , then we can find  $t_0$  and  $\theta_0$ , such that  $h(A^{\theta_0} + t_0, B) = 0$ . From Lemma 1 we have  $A^{\theta_0} + t_0 = B$  in  $\mathbb{R}^d$ , so  $A \stackrel{\triangle}{=} B$ . (Here  $A \stackrel{\triangle}{=} B$  means that  $A$  and  $B$  are of the same shape, i.e. we can find translation  $t$  and rotation  $\theta$ , such that  $A^\theta + t = B$ ).

On the other hand, if  $A \stackrel{\triangle}{=} B$ , then we can find  $t_0$  and  $\theta_0$ , s.t.  $A^{\theta_0} + t_0 = B$ .

Then  $h(A^{\theta_0} + t_0, B) = 0$  and  $H^d(A, B) = \inf_{t, \theta} h(A^\theta + t, B) = 0$ .

$H^d(A, B) = 0$  if and only if  $A \stackrel{\triangle}{=} B$ .

2.

$$H^d(A, B) \tag{17}$$

$$= \inf_{t, \theta} h(A^\theta + t, B) \tag{18}$$

$$= \inf_{t, \theta} h(A, (B - t)^{-\theta}) \tag{19}$$

$$= \inf_{t, \theta} h((B - t)^{-\theta}, A) \tag{20}$$

$$= \inf_{t, \theta} h(B^{-\theta} - t, A) \tag{21}$$

$$= \inf_{t', \theta'} h(B^{\theta'} + t', A) \tag{22}$$

$$= H^d(B, A) \tag{23}$$

3. Take three finite point sets  $A, B, C$  in  $\mathbb{R}^d$  and show that  $H^d(A, B) \leq H^d(A, C) + H^d(B, C)$ . This is equivalent to

$$\inf_{t, \theta} h(A^\theta + t, B) \leq \inf_{t, \theta} h(A^\theta + t, C) + \inf_{t, \theta} h(B^\theta + t, C) \tag{24}$$

Since the rotation group is compact and we only need to consider the translation in a compact region, we can find  $\theta_1, t_1, \theta_2, t_2$ , s.t.

$$h(A^{\theta_1} + t_1, C) = \inf_{t, \theta} h(A^\theta + t, C) \tag{25}$$

$$h(B^{\theta_2} + t_2, C) = \inf_{t, \theta} h(B^\theta + t, C) \tag{26}$$

That gives us

$$H^d(A, C) + H^d(B, C) \quad (27)$$

$$= \inf_{t, \theta} h(A^\theta + t, C) + \inf_{t, \theta} h(B^\theta + t, C) \quad (28)$$

$$= h(A^{\theta_1} + t_1, C) + h(B^{\theta_2} + t_2, C) \quad (29)$$

$$\geq h(A^{\theta_1} + t_1, B^{\theta_2} + t_2) \quad (30)$$

$$= h(A^{\theta_1} + t_1 - t_2, B^{\theta_2}) \quad (31)$$

$$= h((A^{\theta_1} + t_1 - t_2)^{-\theta_2}, B) \quad (32)$$

$$= h(A^{\theta_1 - \theta_2} + t_1 - t_2, B) \quad (33)$$

$$\geq \inf_{t, \theta} h(A^\theta + t, B) \quad (34)$$

$$= H^d(A, B) \quad (35)$$

The triangle inequality holds.

We have proven that  $H^d$  is a metric.

### 1.3 Theorem:

Let A and B be two point sets of finite points in  $\mathbb{R}^2$ . For a rotation  $\theta$ , we define  $P_x(A^\theta)$  to be the x-axis projection of  $A^\theta$ .

$$D(A, B) = \max \left\{ \sup_{\theta} \inf_{\varphi} H^1(P_x(A^\theta), P_x(B^\varphi)), \sup_{\varphi} \inf_{\theta} H^1(P_x(A^\theta), P_x(B^\varphi)) \right\} \quad (36)$$

Here  $H^1$  is the minimum one-dimensional Hausdorff distance,

$$H^1(A, B) = \inf_{t \in \mathbb{R}} \max \left\{ \max_{a \in A+t} \min_{b \in B} |a - b|, \max_{b \in B} \min_{a \in A+t} |b - a| \right\} \quad (37)$$

then  $D$  is a metric.

Proof:

1.

$$D(A, B) = \max\left\{\sup_{\theta} \inf_{\varphi} H^1(P_x(A^\theta), P_x(B^\varphi)), \sup_{\varphi} \inf_{\theta} H^1(P_x(A^\theta), P_x(B^\varphi))\right\} \quad (38)$$

$$D(B, A) = \max\left\{\sup_{\theta} \inf_{\varphi} H^1(P_x(B^\theta), P_x(A^\varphi)), \sup_{\varphi} \inf_{\theta} H^1(P_x(B^\theta), P_x(A^\varphi))\right\} \quad (39)$$

Since  $H^1(A, B) = H^1(B, A)$ , we have

$$\begin{aligned} \sup_{\theta} \inf_{\varphi} H^1(P_x(A^\theta), P_x(B^\varphi)) &= \sup_{\varphi} \inf_{\theta} H^1(P_x(B^\theta), P_x(A^\varphi)) \\ \sup_{\varphi} \inf_{\theta} H^1(P_x(A^\theta), P_x(B^\varphi)) &= \sup_{\theta} \inf_{\varphi} H^1(P_x(B^\theta), P_x(A^\varphi)) \end{aligned} \quad (40)$$

which gives us  $D(A, B) = D(B, A)$ .

2. We take three sets A, B, C of finite points in  $\mathbb{R}^2$  and show that  $D(A, B) \leq D(A, C) + D(C, B)$ . First we prove that

$$\inf_{\varphi} H^1(P_x(A^{\theta_0}), P_x(B^\varphi)) \leq D(A, C) + D(C, B) \quad (41)$$

for each fixed  $\theta_0$ . Assume  $\alpha_0$  is a rotation, s.t.

$$H^1(P_x(A^{\theta_0}), P_x(C^{\alpha_0})) = \inf_{\alpha} H^1(P_x(A^{\theta_0}), P_x(C^\alpha)) \quad (42)$$

$\varphi_0$  is a rotation, s.t.

$$H^1(P_x(C^{\alpha_0}), P_x(B^{\varphi_0})) = \inf_{\varphi} H^1(P_x(C^{\alpha_0}), P_x(B^\varphi)) \quad (43)$$

So

$$\inf_{\varphi} H^1(P_x(A^{\theta_0}), P_x(B^{\varphi})) \quad (44)$$

$$\leq H^1(P_x(A^{\theta_0}), P_x(B^{\varphi_0})) \quad (45)$$

$$\leq H^1(P_x(A^{\theta_0}), P_x(C^{\alpha_0})) + H^1(P_x(C^{\alpha_0}), P_x(B^{\varphi_0})) \quad (46)$$

$$= \inf_{\alpha} H^1(P_x(A^{\theta_0}), P_x(C^{\alpha})) + \inf_{\varphi} H^1(P_x(C^{\alpha_0}), P_x(B^{\varphi})) \quad (47)$$

$$\leq \sup_{\theta} \inf_{\alpha} H^1(P_x(A^{\theta}), P_x(C^{\alpha})) + \sup_{\alpha} \inf_{\varphi} H^1(P_x(C^{\alpha}), P_x(B^{\varphi})) \quad (48)$$

$$\leq D(A, C) + D(C, B) \quad (49)$$

for each fixed rotation  $\theta_0$ .

We take the maximum of all rotation  $\theta$  in the left hand, and we get

$$\sup_{\theta} \inf_{\varphi} H^1(P_x(A^{\theta}), P_x(B^{\varphi})) \leq D(A, C) + D(C, B) \quad (50)$$

Similarly, we can get

$$\sup_{\varphi} \inf_{\theta} H^1(P_x(A^{\theta}), P_x(B^{\varphi})) \leq D(A, C) + D(C, B) \quad (51)$$

So

$$D(A, B) = \max\{\sup_{\theta} \inf_{\varphi} H^1(P_x(A^{\theta}), P_x(B^{\varphi})), \sup_{\varphi} \inf_{\theta} H^1(P_x(A^{\theta}), P_x(B^{\varphi}))\} \quad (52)$$

$$\leq D(A, C) + D(C, B) \quad (53)$$

The triangle inequality holds.

3. Obviously  $D(A, B) \geq 0$  for any two point sets A,B.

We need to prove that  $A \stackrel{\triangle}{=} B$  if and only if  $D(A, B) = 0$ .

If  $A \stackrel{\triangle}{=} B$ , then  $D(A, B) = 0$ .

Conversely, if  $D(A, B) = 0$ , we need to show that  $A \stackrel{\triangle}{=} B$ .

Assume that there are  $m$  points in set  $A$  and  $n$  points in set  $B$ . We assume that  $m > n$ .

We can find a rotation  $\theta_0$ , s.t. the number of points in  $P_x(A^{\theta_0})$  has  $m$  different points, but the number of points in  $P_x(B^\varphi)$  is no more than  $n$ , so

$$P_x(A^{\theta_0}) \neq P_x(B^\varphi) \quad (54)$$

$$\implies \inf_{\varphi} H^1(P_x(A^{\theta_0}), P_x(B^\varphi)) > 0 \quad (55)$$

$$\implies D(A, B) > 0 \quad (56)$$

Contradiction! So we must have  $m \leq n$ . Similarly we can get  $n \leq m$ . So  $m = n$ . The number of points of the two sets must be the same.

We consider a new question. If we know all the x-axis projections of set  $A$  with different rotation  $\theta$ , can we reconstruct set  $A$  in the x,y-plane? This question is equivalent to the original question because all the projection of set  $A$  and set  $B$  are the same if  $D(A, B) = 0$ , and we are about to show that the answer of this new question is yes.

First we consider a simple situation. There are only three different points in set  $A$ . Without loss of generality we fix a point at the origin. Then we rotate the set  $A$  three times so that each time a line that connects two points of  $A$  parallels the x-axis. So we can know the distance of any two points in set  $A$  from the information of projections, then the shape of set  $A$  is fixed.

If there are  $n$  different points in set  $A$ , again we fix a point at the origin  $O$ . Similarly we can determine the shape of the triangle  $\triangle OA_1A_2$  with three rotations.

For the next point  $A_3$ , we can know the distance between  $A_3, O$ , the distance between  $A_3, A_1$  and the distance between  $A_3, A_2$  by three rotations. So the location of  $A_3$  is fixed. The other points are fixed in the same way.

For each point, we need three other rotations. So with  $3+3(n-3) = 3n-6$  rotations, the shape of A is fixed.

It means that we can reconstruct the set A in a plane from the information of  $P_x(A^\theta)$  for all  $\theta$ . If  $D(A, B) = 0$ , the projections of A and B with all the rotations are the same.  $A \stackrel{\Delta}{=} B$ .

With symmetry, triangle inequality, non-negativity and identity of indiscernibles as shown above, we have proven that  $D$  is a metric. Q.E.D.

**Remark:** This theorem has a more general version.  $D(A, B)$  defined in Euclidean space  $\mathbb{R}^d$  is a metric, for all  $d \geq 2$ .

Proof: Symmetry, triangle inequality and non-negativity can be proven the same way above. We only need to prove identity of indiscernibles.

Again, we only need to show that we can reconstruct set A up to rigid motion in  $\mathbb{R}^d$  with all the x-axis projections of A with different rotation  $\theta$ . For  $d=2$ , we have shown that  $3n-6$  rotations is enough to reconstruct A. There is a similar formula for arbitrary  $d$ . Once we reconstruct A in  $\mathbb{R}^d$  with all the x-axis projections of A with different rotation  $\theta$ ,  $D(A, B) = 0$  gives us  $A \stackrel{\Delta}{=} B$ .

We have proven that  $D$  is a metric.

## 2 Proof that $H^2(A, B) \geq D(A, B)$

### 2.1 Lemma

Let  $A = \{a_1, a_2, \dots, a_n\} \subset \mathbb{R}^2$ ,  $B = \{b_1, b_2, \dots, b_m\} \subset \mathbb{R}^2$ . Let

$$d(A, B) = \max_{1 \leq i \leq n} \min_{1 \leq j \leq m} d(a_i, b_j) \quad (57)$$

$$d(B, A) = \max_{1 \leq j \leq m} \min_{1 \leq i \leq n} d(b_j, a_i) \quad (58)$$

$$h(A, B) = \max\{d(A, B), d(B, A)\} \quad (59)$$

then

$$h(A^\theta, B^\varphi) \geq H^1(P_x(A^\theta), P_x(B^\varphi)) \quad (60)$$

for any rotation  $\theta$  and  $\varphi$ . Here  $H^1$  is the minimum one-dimensional Hausdorff distance.

Proof: Assume  $A^\theta = \{a_{1\theta}, a_{2\theta}, \dots, a_{n\theta}\}$ ,  $B^\varphi = \{b_{1\varphi}, b_{2\varphi}, \dots, b_{m\varphi}\}$ ,  $P_x(A^\theta) = \{x_{1\theta}, x_{2\theta}, \dots, x_{n\theta}\}$ ,  $P_x(B^\varphi) = \{y_{1\varphi}, y_{2\varphi}, \dots, y_{m\varphi}\}$ .  $x_{i\theta}$  is the x-projection of  $a_{i\theta}$ ,  $1 \leq i \leq n$  and  $y_{j\varphi}$  is the x-projection of  $b_{j\varphi}$ ,  $1 \leq j \leq m$ .

$d(a_{i\theta}, b_{j\varphi}) \geq d(x_{i\theta}, y_{j\varphi})$  for any i,j. Take the minimum of  $j = 1, 2, \dots, m$  in this inequality, and we get

$$\min_{1 \leq j \leq m} d(a_{i\theta}, b_{j\varphi}) \geq \min_{1 \leq j \leq m} d(x_{i\theta}, y_{j\varphi}) \quad (61)$$

Take the max of  $i = 1, 2, \dots, n$  in this inequality, and we get

$$\max_{1 \leq i \leq n} \min_{1 \leq j \leq m} d(a_{i\theta}, b_{j\varphi}) \geq \max_{1 \leq i \leq n} \min_{1 \leq j \leq m} d(x_{i\theta}, y_{j\varphi}) \quad (62)$$

This means

$$d(A^\theta, B^\varphi) \geq d(P_x(A^\theta), P_x(B^\varphi)) \quad (63)$$

Similarly we have

$$d(B^\varphi, A^\theta) \geq d(P_x(B^\varphi), P_x(A^\theta)) \quad (64)$$

$$h(A^\theta, B^\varphi) \quad (65)$$

$$= \max\{d(A^\theta, B^\varphi), d(B^\varphi, A^\theta)\} \quad (66)$$

$$\geq \max\{d(P_x(A^\theta), P_x(B^\varphi)), d(P_x(B^\varphi), P_x(A^\theta))\} \quad (67)$$

$$= h(P_x(A^\theta), P_x(B^\varphi)) \quad (68)$$

$$\geq \inf_{t \in \mathbb{R}} h(P_x(A^\theta) + t, P_x(B^\varphi)) \quad (69)$$

$$= H^1(P_x(A^\theta), P_x(B^\varphi)) \quad (70)$$

Q.E.D.

## 2.2 Theorem

Let  $A = \{a_1, a_2, \dots, a_n\} \subset \mathbb{R}^2$ ,  $B = \{b_1, b_2, \dots, b_m\} \subset \mathbb{R}^2$ .  $H^2(A, B)$  is the minimum two-dimensional Hausdorff distance of  $A$  and  $B$ , i.e.

$$H^2(A, B) = \inf_{t \in \mathbb{R}^2} \inf_{\theta} h(A^\theta + t, B)$$

$$D(A, B) = \max\{\sup_{\theta} \inf_{\varphi} H^1(P_x(A^\theta), P_x(B^\varphi)), \sup_{\varphi} \inf_{\theta} H^1(P_x(A^\theta), P_x(B^\varphi))\}.$$

Then  $H^2(A, B) \geq D(A, B)$ .

Proof: Assume

$$d(A, B) = \max_{1 \leq i \leq n} \min_{1 \leq j \leq m} d(a_i, b_j) \quad (71)$$

$$d(B, A) = \max_{1 \leq j \leq m} \min_{1 \leq i \leq n} d(b_j, a_i) \quad (72)$$

$$h(A, B) = \max\{d(A, B), d(B, A)\} \quad (73)$$

$$H^2(A, B) = \inf_{t \in \mathbb{R}^2} \inf_{\theta} h(A^\theta + t, B) \quad (74)$$

First we prove that  $h(A^{\theta_1} + t_1, B) \geq D(A, B)$  for any fixed  $\theta_1$  and  $t_1$ . We only need to show that  $h(A^{\theta_1} + t_1, B) \geq \sup_{\theta} \inf_{\varphi} H^1(P_x(A^\theta), P_x(B^\varphi))$ .

Fix  $\theta = \theta_2$ ,

$$h(A^{\theta_1} + t_1, B) \quad (75)$$

$$= h(A^{\theta_1}, B - t_1) \quad (76)$$

$$= h(A, (B - t_1)^{-\theta_1}) \quad (77)$$

$$= h(A^{\theta_2}, (B - t_1)^{-\theta_1 + \theta_2}) \quad (78)$$

$$= h(A^{\theta_2}, B^{-\theta_1 + \theta_2} - t_1) \quad (79)$$

$$\geq H^1(P_x(A^{\theta_2}), P_x(B^{-\theta_1 + \theta_2} - t_1)) \quad (80)$$

$$= H^1(P_x(A^{\theta_2}), P_x(B^{-\theta_1 + \theta_2})) \quad (81)$$

$$\geq \inf_{\varphi} H^1(P_x(A^{\theta_2}), P_x(B^\varphi)) \quad (82)$$

Equation (80) above is from the lemma. That gives us

$$h(A^{\theta_1} + t_1, B) \geq \inf_{\varphi} H^1(P_x(A^{\theta_2}), P_x(B^{\varphi})) \quad (83)$$

for any fixed  $\theta_2$ , which means

$$h(A^{\theta_1} + t_1, B) \geq \sup_{\theta} \inf_{\varphi} H^1(P_x(A^{\theta}), P_x(B^{\varphi})) \quad (84)$$

Similarly we can get

$$h(A^{\theta_1} + t_1, B) \geq \sup_{\varphi} \inf_{\theta} H^1(P_x(A^{\theta}), P_x(B^{\varphi})) \quad (85)$$

Equations (84) and (85) give us

$$h(A^{\theta_1} + t_1, B) \quad (86)$$

$$\geq \max\{\sup_{\theta} \inf_{\varphi} H^1(P_x(A^{\theta}), P_x(B^{\varphi})), \sup_{\varphi} \inf_{\theta} H^1(P_x(A^{\theta}), P_x(B^{\varphi}))\} \quad (87)$$

$$= D(A, B) \quad (88)$$

for any  $\theta_1$  and  $t_1$ . Take minimum of the left hand, and we have

$$\inf_{t \in \mathbb{R}^2} \inf_{\theta} h(A^{\theta} + t, B) \geq D(A, B) \quad (89)$$

$$\implies H^2(A, B) \geq D(A, B) \quad (90)$$

Q.E.D.

### 3 A simple example

Let  $A = \{(0, 0), (0, 1), (1, 0), (1, 1)\} \subset \mathbb{R}^2, B = \{(0, 0), (0, 1), (1, 1)\} \subset \mathbb{R}^2$ . We will show that  $H^2(A, B) = \frac{1}{2} > \frac{\sqrt{5}}{10} = D(A, B)$

### 3.1 Compute $H^2(A, B)$

First we prove that  $h(A, B^\theta + t) \geq \frac{1}{2}$  for all fixed  $\theta$  and  $t$ .

Draw 4 disks of radius  $\frac{1}{2}$  centered at  $O(0, 0), M(0, 1), P(1, 0), N(1, 1)$ . Because there are three points in  $B^\theta + t$ , there must be a disk that does not contain any point of  $B^\theta + t$ . We denote the four disks  $C_O, C_M, C_N, C_P$  and assume that there is no point of  $B^\theta + t$  in  $C_O$ .

So

$$\min_{b_j \in B^\theta + t} d(O, b_j) \geq \frac{1}{2} \quad (91)$$

$$\implies d(O, B^\theta + t) \geq \frac{1}{2} \quad (92)$$

which gives us

$$d(A, B^\theta + t) = \max_{a_i \in A} d(a_i, B^\theta + t) \geq \frac{1}{2} \quad (93)$$

$$h(A, B^\theta + t) = \max\{d(A, B^\theta + t), d(B^\theta + t, A)\} \geq \frac{1}{2} \quad (94)$$

Take minimum of the left hand of equation (94), we have

$$\inf_{t \in \mathbb{R}^2} \inf_{\theta} h(A, B^\theta + t) \geq \frac{1}{2} \quad (95)$$

We then show that  $\inf_{t \in \mathbb{R}^2} \inf_{\theta} h(A, B^\theta + t) = \frac{1}{2}$ .

Take a rigid motion from  $B$  to  $B' = \{(\frac{1}{2}, 0), (\frac{3}{2}, 0), (\frac{1}{2}, 1)\}$ .

$$d(A, B') = \max_{a_i \in A} \min_{b_j \in B'} d(a_i, b_j) = \frac{1}{2} \quad (96)$$

$$d(B', A) = \max_{b_j \in B'} \min_{a_i \in A} d(b_j, a_i) = \frac{1}{2} \quad (97)$$

$$h(A, B') = \max\{d(A, B'), d(B', A)\} = \frac{1}{2} \quad (98)$$

So

$$H^2(A, B) \quad (99)$$

$$= H^2(B, A) \quad (100)$$

$$= \inf_{t \in \mathbb{R}^2} \inf_{\theta} h(B^\theta + t, A) \quad (101)$$

$$= \inf_{t \in \mathbb{R}^2} \inf_{\theta} h(A, B^\theta + t) \quad (102)$$

$$= \frac{1}{2} \quad (103)$$

### 3.2 Compute D(A,B)

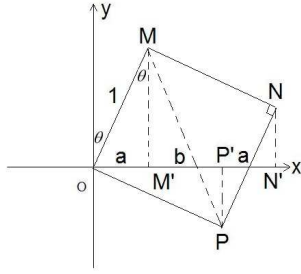

Figure 12: Diagram for computing the Yau-Hausdorff distance

First we compute  $\sup_{\theta} \inf_{\varphi} H^1(P_x(A^\theta), P_x(B^\varphi))$ .

Without loss of generality we may assume

$$0 \leq \theta \leq \frac{\pi}{2}.$$

Let the projection of M, N, P after rotation  $\theta$  be M', N', P' (Fig.12).

Let  $a = OM' = \sin \theta$ ,  $b = M'P'$ , then  $P'N' = \sin \theta = a$ .

Next we prove that  $\inf_{\varphi} H^1(P_x(A^\theta), P_x(B^\varphi)) = \frac{1}{2} \min\{a, b\}$ .

Assume  $a \leq b$ , draw four disks of radius  $\frac{1}{2}a$  centered at  $O, M', N', P'$ , denoted as  $C_O, C_{M'}, C_{N'}, C_{P'}$ .

Because there are no more than three points in the projection of  $B^\varphi$ , there must be a disk that does not contain any point of  $P_x(B^\varphi)$ . So  $H^1(P_x(A^\theta), P_x(B^\varphi)) \geq \frac{1}{2}a$ , for any rotation  $\varphi$ .

We then take a rigid motion  $\varphi_0$ , s.t.  $P_x(B^{\varphi_0}) = \{O, M', N'\}$ .

Take  $t = -\frac{1}{2}a$ , and translate  $P_x(B^{\varphi_0})$  by  $t$ .

Assume  $P_x(B^{\varphi_0}) - \frac{1}{2}a = \{O'', M'', N''\}$ . We can see that the Hausdorff distance

between  $P_x(A^\theta)$  and  $P_x(B^{\varphi_0}) - \frac{1}{2}a$  is  $\frac{1}{2}a$ . So

$$H^1(P_x(A^\theta), P_x(B^{\varphi_0})) = \frac{1}{2}a \quad (104)$$

$$\inf_{\varphi} H^1(P_x(A^\theta), P_x(B^\varphi)) = \frac{1}{2}a = \frac{1}{2} \min\{a, b\} \quad (105)$$

Assume  $b \leq a$ , we can prove equation (105) in the same way.

Now we compute  $\sup_{\theta} \inf_{\varphi} H^1(P_x(A^\theta), P_x(B^\varphi))$ , it is equal to  $\frac{1}{2} \sup_{\theta} \min\{a, b\}$ .

We can see that  $\min\{a, b\}$  achieves the maximum for  $\theta$  if and only if  $a = b$ , because if one of the values of  $\{a, b\}$  increases, the other will decrease. Assume that the rotation of A is  $\theta_0$ , s.t.  $a=b$ .

So

$$a = OM \sin \theta_0 = \sin \theta_0, \angle OMM' = \theta_0 \quad (106)$$

$$\angle M'MP = \angle OMP - \angle OMM' = \frac{\pi}{4} - \theta_0 \quad (107)$$

$$b = MP \sin \angle M'MP \quad (108)$$

$$= \sqrt{2} \sin\left(\frac{\pi}{4} - \theta_0\right) \quad (109)$$

$$= \sqrt{2} \left( \frac{\sqrt{2}}{2} \cos \theta_0 - \frac{\sqrt{2}}{2} \sin \theta_0 \right) \quad (110)$$

$$= \cos \theta_0 - \sin \theta_0 \quad (111)$$

$$a = b \quad (112)$$

$$\implies \sin \theta_0 = \cos \theta_0 - \sin \theta_0 \quad (113)$$

$$\implies \cos \theta_0 = 2 \sin \theta_0 \quad (114)$$

$$\implies \sin \theta_0 = \frac{\sqrt{5}}{5}, \cos \theta_0 = \frac{2\sqrt{5}}{5} \quad (115)$$

So  $a = b = \sin \theta_0 = \frac{\sqrt{5}}{5}$ .

$$\sup_{\theta} \inf_{\varphi} H^1(P_x(A^\theta), P_x(B^\varphi)) \quad (116)$$

$$= \inf_{\varphi} H^1(P_x(A^{\theta_0}), P_x(B^\varphi)) \quad (117)$$

$$= \frac{1}{2} \min\left\{ \frac{\sqrt{5}}{5}, \frac{\sqrt{5}}{5} \right\} \quad (118)$$

$$= \frac{\sqrt{5}}{10} \quad (119)$$

Similarly we can prove that

$$\sup_{\varphi} \inf_{\theta} H^1(P_x(A^\theta), P_x(B^\varphi)) < \frac{\sqrt{5}}{10} \quad (120)$$

$$D(A, B) \quad (121)$$

$$= \max\left\{ \sup_{\theta} \inf_{\varphi} H^1(P_x(A^\theta), P_x(B^\varphi)), \sup_{\varphi} \inf_{\theta} H^1(P_x(A^\theta), P_x(B^\varphi)) \right\} \quad (122)$$

$$= \frac{\sqrt{5}}{10} \quad (123)$$
