# Supplementary material for: Two Dimensional Yau-Hausdorff Distance with Applications on Comparison of DNA and Protein Sequences
Source: PLoS One. 2015 Sep 18;10(9):e0136577. doi: 10.1371/journal.pone.0136577 (PMC4575136; doi:10.1371/journal.pone.0136577)
Supplement: S2 File — (XLSX) [file pone.0136577.s002.xlsx]

## Sheet: Data_Fig1
GenBankId	Name
X93334	Homo sapiens mitochondrial DNA

## Sheet: Data_Fig2
GenBankId	Name
FJ027248	Buteo_magnirostris
GU571285	Bubo_bubo
GU571394	Falco_tinnunculus
HQ979362	Callobius_bennetti
JF792341	Accipiter_gularis
JF792345	Accipiter_francesiae
JQ175565	Ninox_variegata
JQ175647	Otus_scops
JQ740218	Luscinia_megarhynchos

## Sheet: Data_Fig3and4
	Name
BOLDACG1900	Acari sp BOLDACG1900
BOLDACK4637	Acari sp BOLDACK4637
BOLDAAC8370	Anguilliformes sp BOLDAAC8370
BOLDAAH2268	Anguilliformes sp BOLDAAH2268
BOLDACJ2857	Archaeognatha sp BOLDACJ2857
BOLDACJ3418	Archaeognatha sp BOLDACJ3418
BOLDACF6187	Capitellida sp BOLDACF6187
BOLDACF7052	Capitellida sp BOLDACF7052
BOLDACJ9408	Cephalaspidea sp BOLDACJ9408
BOLDACJ9409	Cephalaspidea sp BOLDACJ9409
BOLDAAB2541	Coleoptera sp BOLDAAB2541
BOLDAAB7114	Coleoptera sp BOLDAAB7114
BOLDAAA4673	Ephemeroptera sp BOLDAAA4673
BOLDAAP1713	Ephemeroptera sp BOLDAAP1713
BOLDACJ5852	Eunicida sp BOLDACJ5852
BOLDACJ9615	Eunicida sp BOLDACJ9615
BOLDABA1850	Haplotaxida sp BOLDABA1850
BOLDABA4786	Haplotaxida sp BOLDABA4786

## Sheet: Data_Fig5
GenBankId	Name
AJ293920	A/Hong Kong/1774/99(H3N2)
EU015993	A/swine/Guangxi/13/2006(H1N2)
FJ415615	A/swine/Zhejiang/1/2007(H1N1)
CY010587	A/swine/Spain/53207/2004(H1N1)
EU026021	A/mallard/MD/161/2002(H1N1)
AB434285	A/swine/Ratchaburi/NIAH1481/2000(H1N1)
CY038004	A/swine/England/WVL7/1992(H1N1)
CY009379	A/swine/Spain/33601/2001(H3N2)
EU026109	A/duck/NY/13152-13/1994(H1N1)
CY009899	A/Swine/Spain/50047/2003(H1N1)
EF101747	A/Philippines/344/2004(H1N2)
AB434325	A/swine/Chachoengsao/NIAH587/2005(H1N1)
CY038020	A/swine/Denmark/WVL9/1993(H1N1)
AY233387	A/duck/NC/91347/01(H1N2)
AB434293	A/swine/Ratchaburi/NIAH550/2003(H1N1)
AB473548	A/duck/Mongolia/47/2001(H7N1)
M55470	A/swine/1976/1931(H1N1)
M73515	A/swine/Iowa/15/1930(H1N1)
DQ280189	A/swine/Ontario/57561/03(H1N1)
EU301177	A/swine/Korea/JNS06/2004(H3N2)
GQ377051	A/California/08/2009(H1N1)
FJ966079	A/California/04/2009(H1N1)
NC_026438	A/California/07/2009(H1N1)
GQ117070	A/Minnesota/02/2009(H1N1)
GQ149632	A/Mexico/4604/2009(H1N1)
GQ162198	A/Mexico/4603/2009(H1N1)
FJ966955	A/California/05/2009(H1N1)
GQ379815	A/Mexico/4108/2009(H1N1)
AF250131	A/Swine/Indiana/9K035/99 (H1N2)
EU798929	A/swine/Korea/CAS05/2004(H3N2)
EF101754	A/Thailand/271/2005(H1N1)
FJ998206	A/Mexico/InDRE4487/2009(H1N1)
GQ117089	A/Texas/07/2009(H1N1)
GQ117027	A/Texas/09/2009(H1N1)
CY164119	A/Wisconsin/67/2005(H3N2)
GQ132138	A/Mexico/InDRE4114/2009(H1N1)
CY039908	A/New York/1682/2009(H1N1)
GQ117047	A/Texas/08/2009(H1N1)
FJ969525	A/Texas/04/2009(H1N1)
GQ168879	A/Texas/06/2009(H1N1)
GQ168870	A/Indiana/09/2009(H1N1)
KC781718	A/California/06/2009(H1N1)
GQ117021	A/New York/22/2009(H1N1)
FJ984351	A/New York/18/2009(H1N1)
GQ168878	A/New York/15/2009(H1N1)
GQ117035	A/California/14/2009(H1N1)
GQ168876	A/New York/10/2009(H1N1)
CY037965	A/swine/Belgium/WVL2/1983(H1N1)
EU604691	A/swine/OH/511445/2007(H1N1)
AF455736	A/Swine/Indiana/P12439/00(H1N2)
AF455733	A/Swine/North Carolina/93523/01(H1N2)
DQ464357	A/swan/Germany/R65/2006(H5N1)
AF455737	A/Swine/Illinois/100085A/01(H1N2)
AY619970	A/swine/Ontario/42729A/01(H3N3)
AY676023	A/chicken/Korea/ES/03(H5N1)
CY178726	A/Wisconsin/301/1976(H1N1)
DQ280205	A/swine/Ontario/55383/04(H1N2)
AY619954	A/swine/Saskatchewan/18789/02(H1N1)
CY033629	A/New Caledonia/20/1999(H1N1)
DQ280213	A/swine/Ontario/53518/03(H1N1)
EU880827	A/turkey/CA/358533/2005(H4N8)
DQ469971	A/swine/British Columbia/28103/2005(H3N2)
DQ469987	A/swine/Ontario/33853/2005(H3N2)

## Sheet: Data_Fig6
GenBankId	Name
KC891137	A/Illinois/05/2012(H1N1)
KC891134	A/Illinois/06/2012(H1N1)
KC891128	A/Illinois/08/2012(H1N1)
KC891564	A/Illinois/01/2012(H1N1)
KC891131	A/Illinois/07/2012(H1N1)
KC893127	A/Illinois/13/2012(H3N2)
KC893131	A/Illinois/12/2012(H3N2)
DQ017515	A/mallard/Albert24/01(H7N3)
CY094463	A/winged-teal/Californi11275/2008(H7N3)
CY039542	A/winged-teal/CaliforniAKS1370/2008(H7N3)
CY094575	A/winged-teal/Californi1841/2009(H7N3)
CY135723	A/mallard/Alask10BM05347R0/2010(H7N3)
CY135821	A/mallard/Alask10BM05860R0/2010(H7N3)
CY135965	A/mallard/Alask10BM06838R0/2010(H7N3)
CY135997	A/mallard/Alask10BM06905R0/2010(H7N3)
CY060664	A/Ontario/315015/2009(H1N1)
JF789604	A/mallard/CzechRepublic/13438-29K/2010(H11N9)
GQ184333	A/Baikal-teal/Hongze/14/2005(H11N9)
KF021599	A/Shanghai/02/2013(H7N9)
KC885958	A/Zhejiang/DTID-ZJU01/2013(H7N9)
KC994454	A/Fujian/1/2013(H7N9))
KC853765	A/Hangzhou/1/2013(H7N9)
KF001514	A/Hangzhou/2/2013(H7N9)
KF001517	A/Hangzhou/3/2013(H7N9)
KC896776	A/Nanjing/1/2013(H7N9)
KF278746	A/Jiangsu/1/2013(H7N9)
KC853231	A/Shanghai/4664T/2013(H7N9)
KF018055	A/Taiwan/T02081/2013(H7N9)
KF018047	A/Taiwan/S02076/2013(H7N9)
CY147062	A/duck/Anhui/SC702/2013(H7N9)
CY147070	A/duck/Zhejiang/SC410/2013(H7N9)
KF732006	A/Zhejiang/DTID-ZJU10/2013(H7N9)
KF259731	A/chicken/Rizhao/867/2013(H7N9)
CY146910	A/chicken/Guangdong/SD641/2013(H7N9)
KF768179	A/chicken/Zhejiang/PA-DTID-ZJU01/2013(H7N9)
KF055467	A/Zhejiang/HZ1/2013(H7N9)
JN244222	A/wild-bird/KoreA14/2011(H7N9)
KF297317	A/chicken/Rizhao/719b/2013(H7N9)
KF259730	A/chicken/Rizhao/515/2013(H7N9)
KF150610	A/environment/Wuxi/1/2013(H7N9)
KF034921	A/Wuxi/2/2013(H7N9)
KF034913	A/Wuxi/1/2013(H7N9)
KF420298	A/Changsh1/2013(H7N9)
CY029883	A/tailed-sandpiper/Australi10/2004(H11N9)
AB298284	A/duck/Hokkaido/W245/2004(H11N9)
AB472035	A/duck/Tsukub239/2005(H11N9)
CY025199	A/tailed-sandpiper/Australi6/2004(H11N9)
AB472034	A/duck/Tsukub164/2005(H11N9)
AB472033	A/duck/Tsukub441/2005(H11N9)
KF572435	A/wild-bird/HongKong/07035-1/2011(H5N1)
KF735645	A/barn-swallow/HongKong/1161/2010(H5N1)
AB557634	A/magpie-robin/HongKong/9298/2009(H5N1)

## Sheet: Data_Fig7
GenBankId	Name
NP_001006133	1	protein kinase C [Gallus gallus]
NP_001008716	2	protein kinase C [Canis lupus familiaris]
NP_001012707	3	protein kinase C [Xenopus (Silurana) tropicalis]
O01715	4	protein kinase C [Hydra vulgaris]
O17874	5	protein kinase C [Caenorhabditis elegans]
O19111	6	protein kinase C [Oryctolagus cuniculus]
O42632	7	protein kinase C [Cochliobolus heterostrophus]
O61224	8	protein kinase C [Sycon raphanus]
O61225	9	protein kinase C [Sycon raphanus]
O62567	10	protein kinase C [Suberites domuncula]
O62569	11	protein kinase C [Suberites domuncula]
O76850	12	protein kinase C [Calliphora vicina]
O94806	13	protein kinase C [Homo sapiens]
O96942	14	protein kinase C [Acanthascus dawsoni]
O96997	15	protein kinase C [Geodia cydonium]
P04409	16	protein kinase C [Bos taurus]
P05126	17	protein kinase C [Bos taurus]
P05129	18	protein kinase C [Homo sapiens]
P05130	19	protein kinase C [Drosophila melanogaster]
P05696	20	protein kinase C [Rattus norvegicus]
P05771	21	protein kinase C [Homo sapiens]
P05772	22	protein kinase C [Oryctolagus cuniculus]
P09215	23	protein kinase C [Rattus norvegicus]
P09216	24	protein kinase C [Rattus norvegicus]
P09217	25	protein kinase C [Rattus norvegicus]
P10102	26	protein kinase C [Oryctolagus cuniculus]
P10829	27	protein kinase C [Oryctolagus cuniculus]
P10830	28	protein kinase C [Oryctolagus cuniculus]
P13677	29	protein kinase C [Drosophila melanogaster]
P16054	30	protein kinase C [Mus musculus]
P17252	31	protein kinase C [Homo sapiens]
NP_035231	32	protein kinase C [Mus musculus]
P23298	33	protein kinase C [Mus musculus]
NP_009445	34	protein kinase C [Saccharomyces cerevisiae S288c]
P24723	35	protein kinase C [Homo sapiens]
NP_035233	36	protein kinase C [Mus musculus]
NP_506014	37	protein kinase C [Caenorhabditis elegans]
NP_593737	38	protein kinase C [Schizosaccharomyces pombe 972h-]
NP_595950	39	protein kinase C [Schizosaccharomyces pombe 972h-]
P41743	40	protein kinase C [Homo sapiens]
CAA57048	41	protein kinase C [Candida albicans]
P63318	42	protein kinase C [Mus musculus]
NP_001165776	43	protein kinase C [Rattus norvegicus]
P68404	44	protein kinase C [Mus musculus]
CAA72731	45	protein kinase C [Neurospora crassa]
P90980	46	protein kinase C [Caenorhabditis elegans]
Q2NKI4	47	protein kinase C [Mus musculus]
Q2U6A7	48	protein kinase C [Aspergillus oryzae]
Q3UEA6	49	protein kinase C [Mus musculus]
Q4AED5	50	protein kinase C [Bombyx mori]
Q4AED6	51	protein kinase C [Bombyx mori]
Q4R4U2	52	protein kinase C [Macaca fascicularis]
NP_001126946	53	protein kinase C [Pongo abelii]
Q5TZD4	54	protein kinase C [Danio rerio]
Q6AZF7	55	protein kinase C [Xenopus laevis]
Q6BI27	56	protein kinase C [Debaryomyces hansenii]
Q6C292	57	protein kinase C [Yarrowia lipolytica CLIB122]
Q6DCJ8	58	protein kinase C [Xenopus laevis]
Q6DUV1	59	protein kinase C [Rattus norvegicus]
Q6FJ43	60	protein kinase C [Candida glabrata]
Q6GNZ7	61	protein kinase C [Xenopus laevis]
NP_037487	62	protein kinase C [Homo sapiens]
Q63433	63	protein kinase C [Rattus norvegicus]
Q6UB96	64	protein kinase C [Cryptococcus neoformans var. neoformans
Q6UB97	65	protein kinase C [Cryptococcus neoformans var. grubii]
Q7SY24	66	protein kinase C [Danio rerio]
Q7SZH7	67	protein kinase C [Xenopus laevis]
Q7SZH8	68	protein kinase C [Xenopus laevis]
Q7T2C5	69	protein kinase C [Danio rerio]
Q8IUV5	70	protein kinase C [Homo sapiens]
Q8J213	71	protein kinase C [Kluyveromyces lactis]
Q8JFZ9	72	protein kinase C [Takifugu rubripes]
Q8K1Y2	73	protein kinase C [Mus musculus]
Q8K2K8	74	protein kinase C [Mus musculus]
Q8MXB6	75	protein kinase C [Limulus polyphemus]
Q9BZL6	76	protein kinase C [Homo sapiens]
Q9GSZ3	77	protein kinase C [Drosophila melanogaster]
Q9HF10	78	protein kinase C [Blumeria graminis]
Q9HGK8	79	protein kinase C [Tuber borchii]
Q9UVJ5	80	protein kinase C [Botryotinia fuckeliana]
Q9Y7C1	81	protein kinase C [Magnaporthe grisea]
Q9Y792	82	protein kinase C [Sporothrix schenckii]
Q28EN9	83	protein kinase C [Xenopus (Silurana) tropicalis]
Q69G16	84	protein kinase C [Schistosoma mansoni]
Q75BT0	85	protein kinase C [Eremothecium gossypii]
Q76G54	86	protein kinase C [Emericella nidulans]
Q00078	87	protein kinase C [Aspergillus niger]
Q86XJ6	88	protein kinase C [Homo sapiens]
Q86ZV2	89	protein kinase C [Pichia pastoris]
Q90XF2	90	protein kinase C [Danio rerio]
Q498G7	91	protein kinase C [Xenopus laevis]
Q873Y9	92	protein kinase C [Leptosphaeria maculans]
Q02111	93	protein kinase C [Mus musculus]
Q02156	94	protein kinase C [Homo sapiens]
Q02956	95	protein kinase C [Mus musculus]
NP_006248	96	protein kinase C [Homo sapiens]
NP_002735	97	protein kinase C [Homo sapiens]
Q05655	98	protein kinase C [Homo sapiens]
Q15139	99	protein kinase C [Homo sapiens]
Q16974	100	protein kinase C [Aplysia californica]
Q16975	101	protein kinase C [Aplysia californica]
Q19266	102	protein kinase C [Caenorhabditis elegans]
Q25378	103	protein kinase C [Lytechinus pictus]
NP_032883	104	protein kinase C [Mus musculus]
Q62101	105	protein kinase C [Mus musculus]
Q64617	106	protein kinase C [Rattus norvegicus]
Q91569	107	protein kinase C [Xenopus laevis]
Q91948	108	protein kinase C [Xenopus sp.]
Q99014	109	protein kinase C [Hypocrea jecorina]
XP_391874	110	protein kinase C [Apis mellifera]
XP_234108	111	protein kinase C [Rattus norvegicus]
XP_421417	112	protein kinase C [Gallus gallus]
XP_540151	113	protein kinase C [Canis familiaris]
XP_541432	114	protein kinase C [Canis familiaris]
XP_583587	115	protein kinase C [Bos taurus]
XP_602125	116	protein kinase C [Bos taurus]
XP_683138	117	protein kinase C [Danio rerio]
XP_849292	118	protein kinase C [Canis familiaris]
XP_851386	119	protein kinase C [Canis familiaris]
XP_851861	120	protein kinase C [Canis familiaris]
XP_001066028	121	protein kinase C [Rattus norvegicus]
XP_001116804	122	protein kinase C [Macaca mulatta]
XP_001147999	123	protein kinase C [Pan troglodytes]
XP_001250401	124	protein kinase C [Bos taurus]

## Sheet: Data_Fig8,9and10
GenBankId	Name
P68871	Human
P08851	Goshawk
P18982	Lesser panda
P18983	Giant panda
P02075	Sheep
P02114	Duck
P02115	Mallard
P02117	Goose
CAA33114	Rat
P80216	Penguin
P15165	Swift
P60525	Coyote
O13163	Catfish
P09422	Bison
P68945	Swan
P67820	Buffalo
P60524	Dog
P68873	Chimpanzee
P18990	Dolphin
P02140	Goldfish
P68011	Polar bear
P09907	Rhinoceros
P02112	Chicken
P60526	Wolf
P13274	Turtle
P11342	Pigeon
P68012	Black bear
P02084	Asiatic elephant
P02085	African elephant
P83123	Tortoise
P02028	Grivet
P02024	Gorilla
P02143	Shark
P19016	Hippopotamus
P02062	Horse
P02025	Gibbon
P18984	Whale
P24660	Bat
P21201	Redfox
P08853	Marmot
Q91473	Salmon
P07406	Sparrow
P02113	Pheasant
P02121	Flamingo
P02067	Pig
ADD73488	Dragonfish
P21668	Parakeet
P67824	Zebra
O13077	Cod
P02032	Langur

## Sheet: Data_Fig11
GenBankId	Name
AAG00896	First intron of myeloid cell leukemia protein 1
